# Supplementary material for: Population Pharmacokinetics of Hydroxychloroquine and 3 Metabolites in COVID-19 Patients and Pharmacokinetic/Pharmacodynamic Application
Source: MDPI journal article supplement (doi:10.3390/ph15020256), 2022-02-21
Supplement: s1 [file s1]

## Supplementary Materials

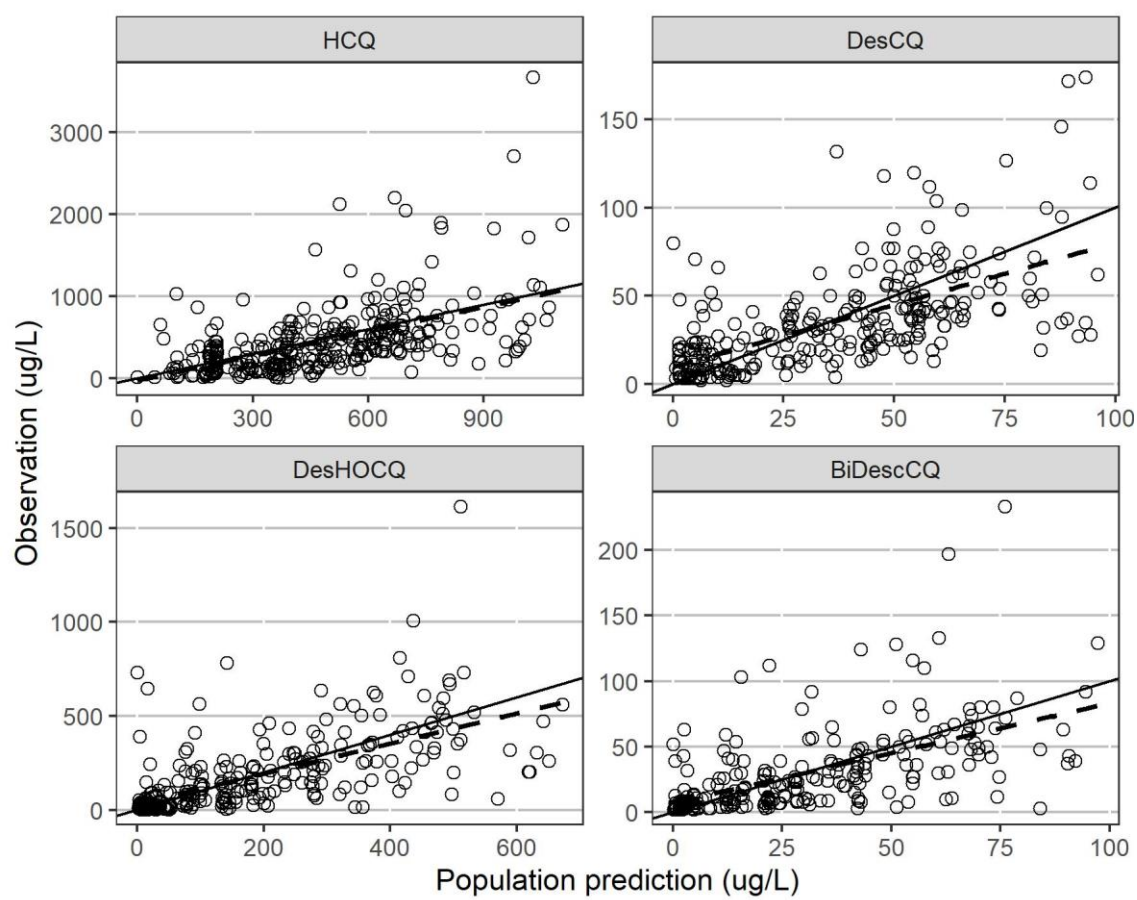

(A)

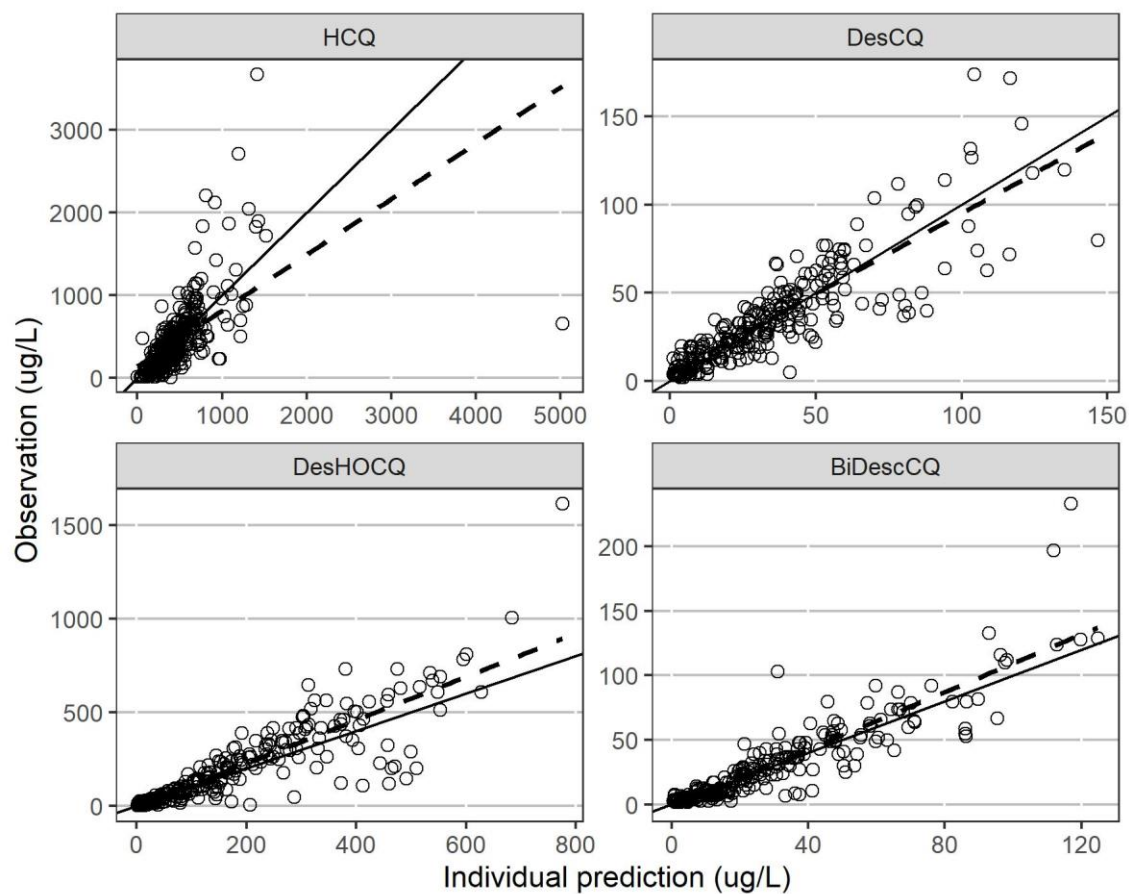

(B)

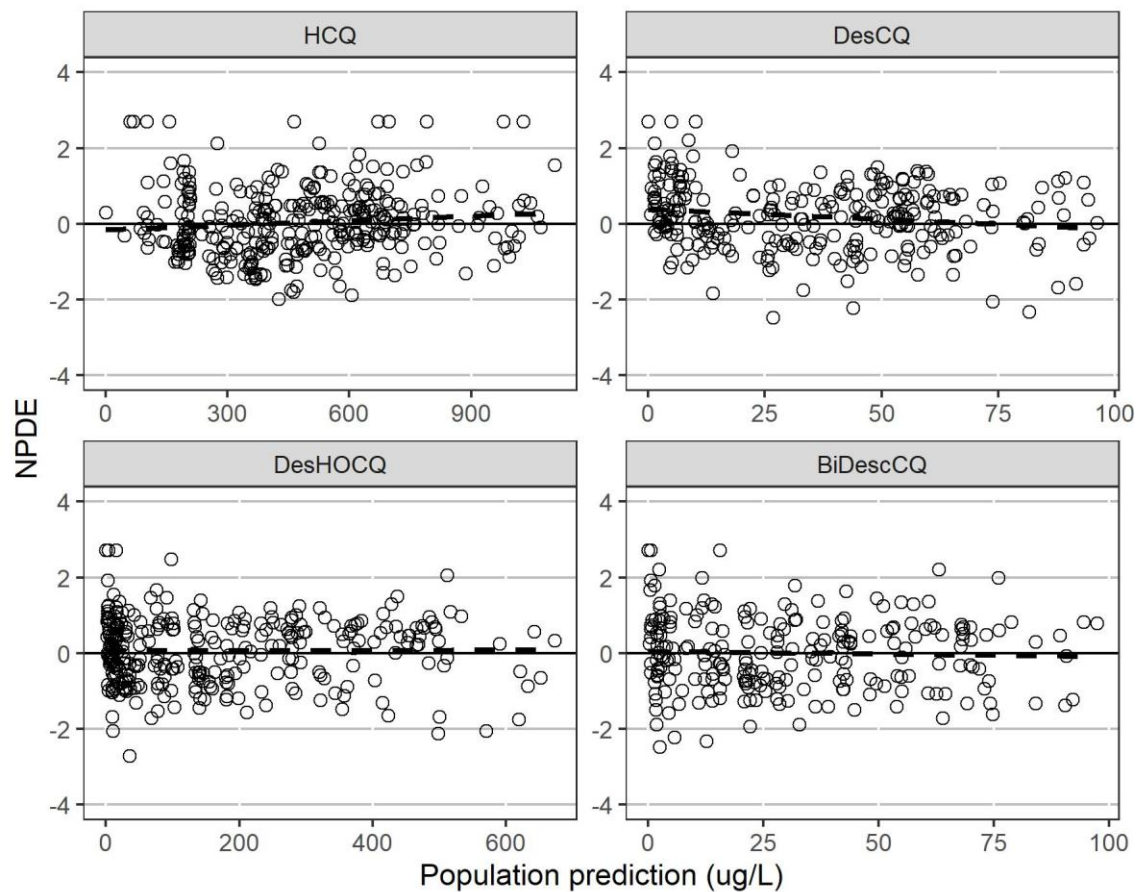

(C)

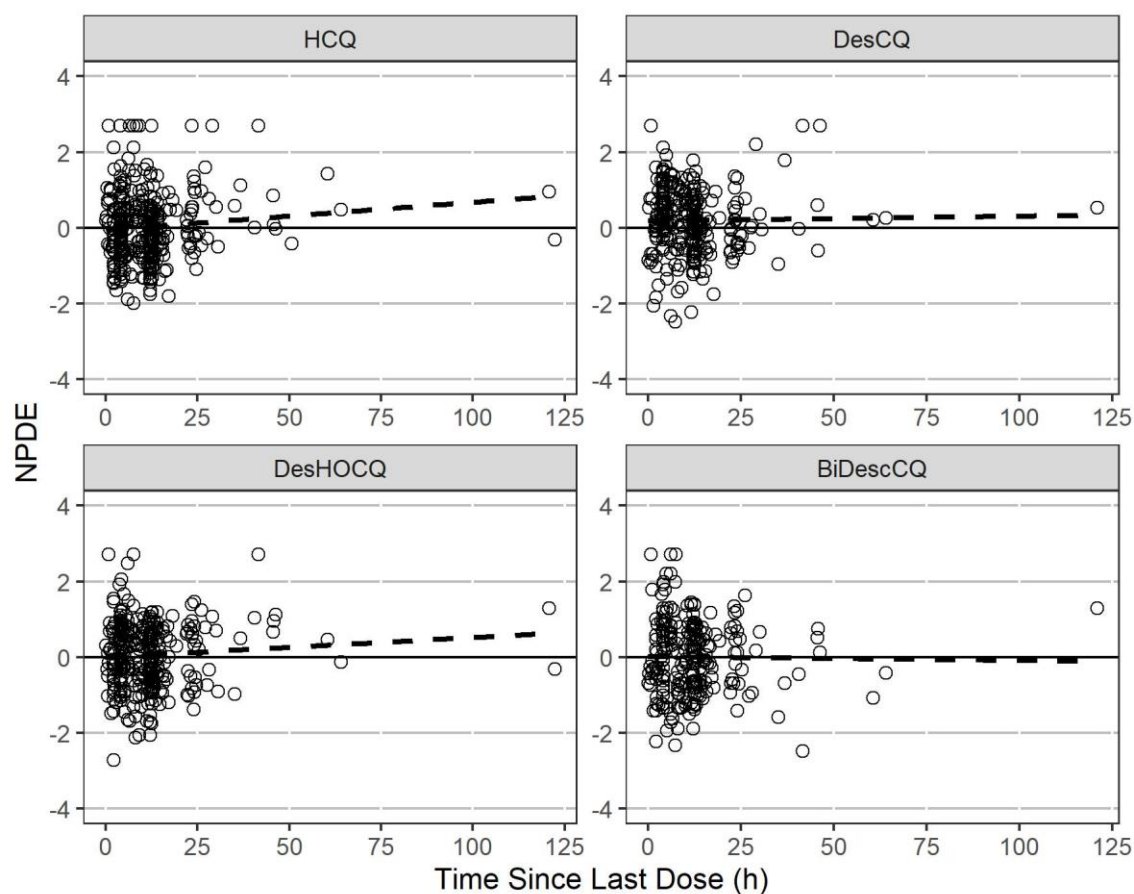

(D)

Figure S1. Goodness-of-plots for the final HCQ, DesHCQ, DesCQ, DiDescCQ and population pharmacokinetic model. (A) Observed concentrations (DV) versus population predictions (PRED), (B) Observed concentrations versus individual predictions (IPRED), (C) normalized predictive distribution error (NPDE) versus predictions, (D) NPDE vs. TIME. Under the figure: The line of identity (black line) and the linear regression (dotted line) are shown.
